# Supplementary material
Source: Springer Nature journal article supplement (https://www.springermedizin.de/resource/supplementary/12872_2007_186_MOESM3_ESM.pdf/9431276)

Additive mode of action

N=5500

P value =  $10^{-7}$

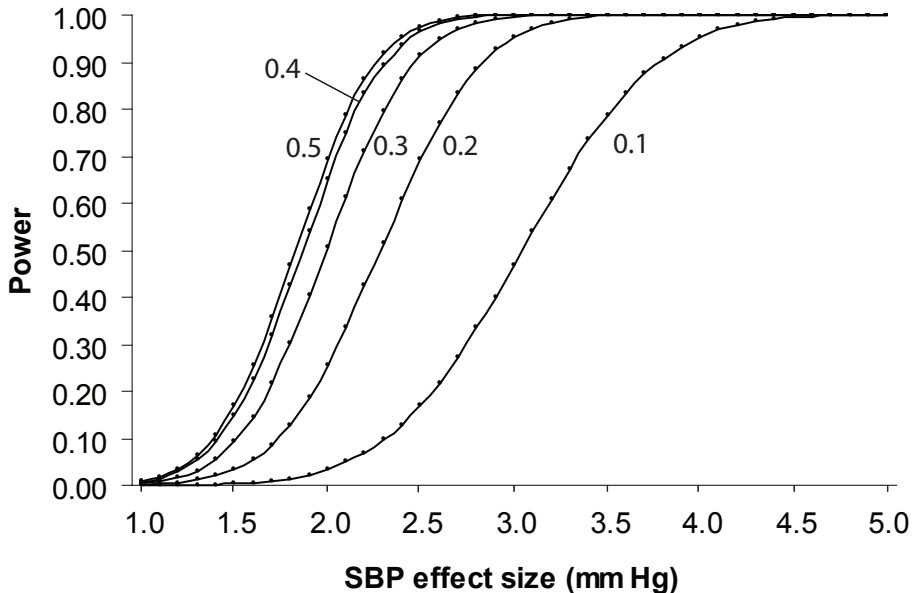

Supplement: MOESM3 [file 9431276]
